# Supplementary material
Source: PubMed Central journal article supplement (PMC3093677)
Supplement: bjp.bp.110.085944_1.pdf [file bjp.bp.110.085944_1.pdf]

## Data supplement

**Table DS1** Studies included in the meta-analysis

| Reference                   | Country  | Period                    | <i>n</i> | Peak                  | Trough                 | Detail                                                                                                                           | Method                                              |
|-----------------------------|----------|---------------------------|----------|-----------------------|------------------------|----------------------------------------------------------------------------------------------------------------------------------|-----------------------------------------------------|
| Watkins (2002) <sup>6</sup> | England  | 1971–1990<br>(born)       | 259      | NS                    | NS                     | Excess in April–June births<br>Great Ormond Street criteria <sup>16</sup>                                                        | Roger's chi-squared                                 |
| Eagles (2001) <sup>4</sup>  | Scotland | 1965–1997<br>(recruited)  | 446      | First half<br>of year | Second half<br>of year | Excess mainly in April–June<br>Criteria not stated                                                                               | Hewitt's test<br>+ chi-squared                      |
| Waller (2002) <sup>7</sup>  | England  |                           | 195      | NS                    | NS                     | Only adult patients<br>Excess in April–June births<br>in restrictive subtypes ( <i>n</i> = 117)<br>DSM–IV <sup>17</sup> criteria | Chi-squared,<br>Mann–Whitney<br>and Spearman's test |
| Button (2007) <sup>5</sup>  | England  | After 1984<br>(recruited) | 393      | NS                    | NS                     | March peak not significant<br>DSM–III <sup>18</sup> and DSM–IV criteria                                                          | Chi-squared<br>+ goodness of fit                    |
| NS, non-significant.        |          |                           |          |                       |                        |                                                                                                                                  |                                                     |

## Additional references

- <sup>16</sup> Bryant-Waugh R, Lask B. Eating disorders in children. *J Child Psychol Psychiatry* 1995; **36**: 191–202.
- <sup>17</sup> American Psychiatric Association. *Diagnostic and Statistical Manual of Mental Disorders (4th edn) (DSM–IV)*. APA, 1994.
- <sup>18</sup> American Psychiatric Association. *Diagnostic and Statistical Manual of Mental Disorders (3rd edn) (DSM–III)*. APA, 1980.
